# Supplementary material for: Capture Hi-C identifies putative target genes at 33 breast cancer risk loci
Source: PubMed Central journal article supplement (PMC5847529; doi:10.1038/s41467-018-03411-9), 2018-03-12
Supplement: 41467_2018_3411_MOESM1_ESM.pdf [file 41467_2018_3411_MOESM1_ESM.pdf]

# **Supplementary Information**

Baxter et al.

Supplementary Figures 1-9

Supplementary Tables 1-3

**Supplementary Figure 1: Schematic of Capture Hi-C method for identification of target genes at GWAS risk loci.**

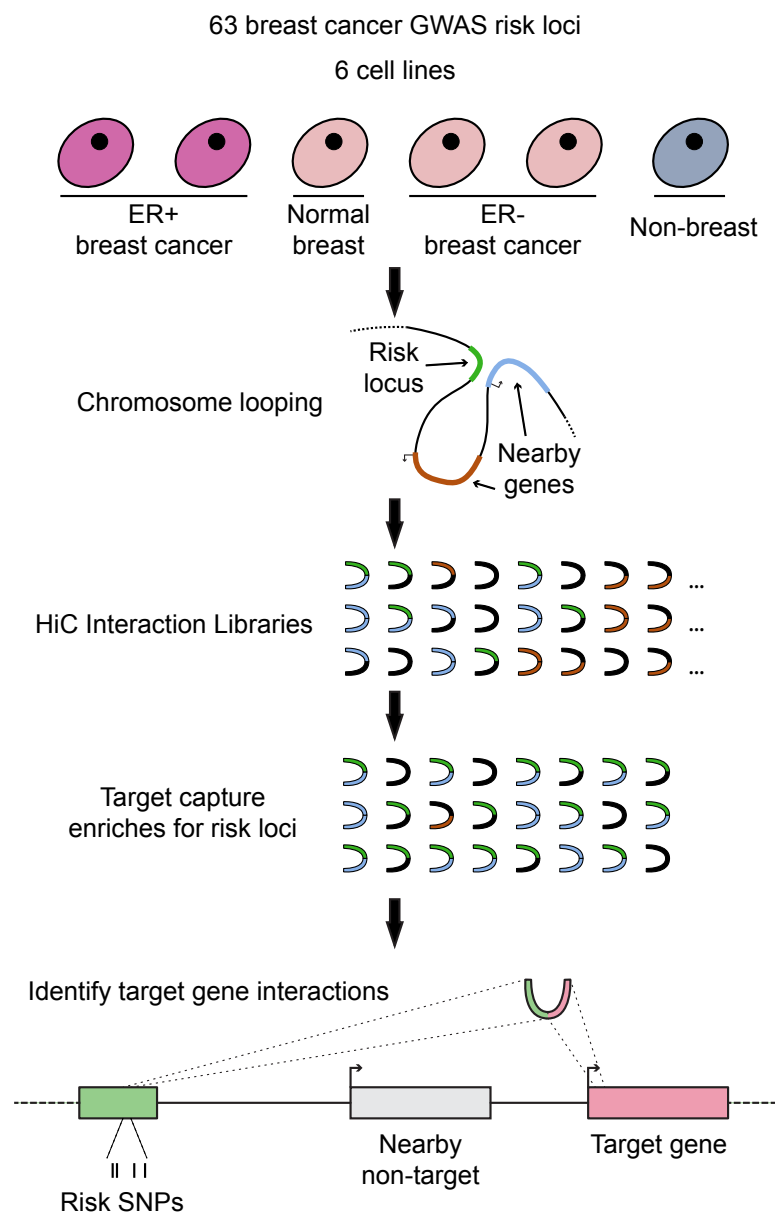

Legend: Hi-C libraries generated in four breast cancer, one normal breast epithelial and one lymphoblastoid cell line were subjected to target enrichment using arrays that captured linkage disequilibrium blocks corresponding to 63 breast cancer risk loci. Putative target genes defined as genes mapping within, or *in cis*, to a captured region for which the transcription start site mapped to an interacting fragment were identified.

Supplementary Figure 2: Histogram showing the number of interaction peaks per locus across 51 informative loci in six cell lines.

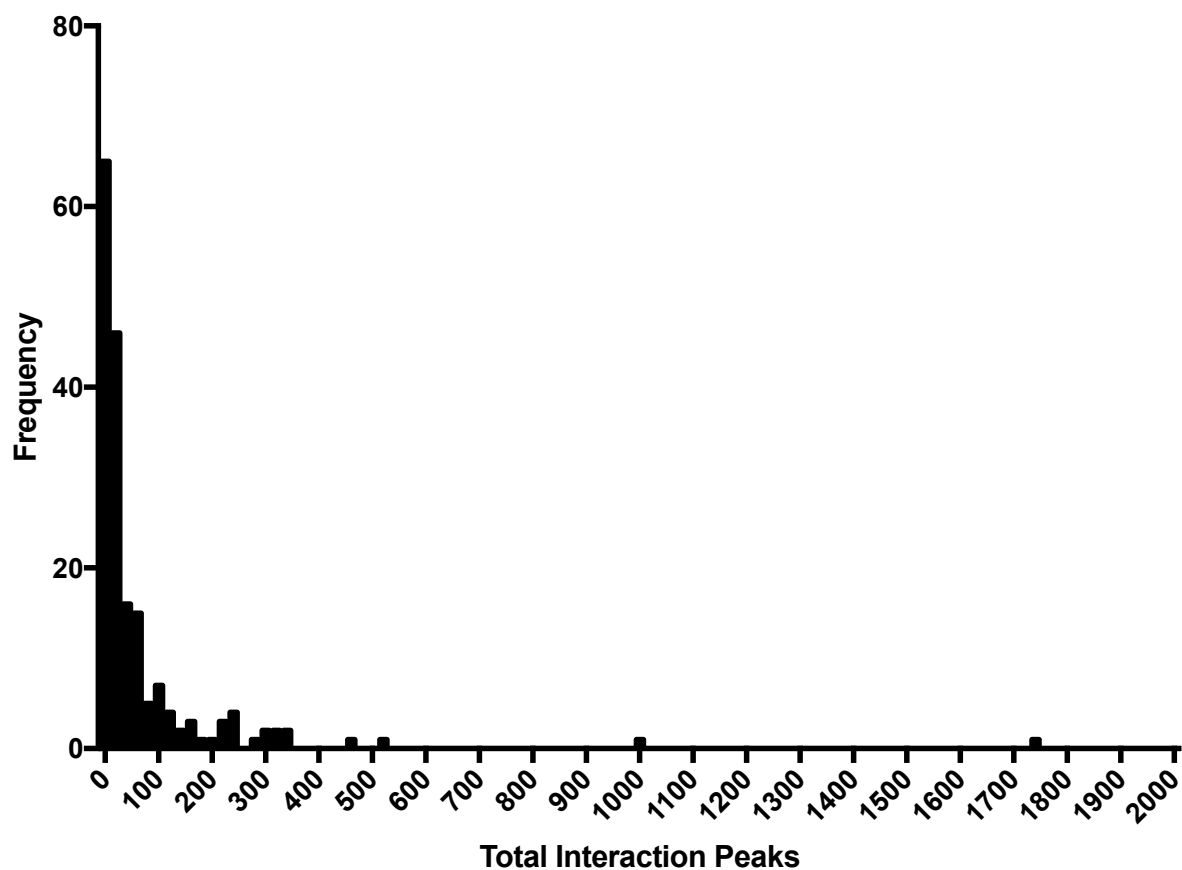

Legend: The number of interaction peaks per locus at 51 loci that had at least one interaction peak in at least one cell line is shown as a histogram. Loci with zero interaction peaks are excluded (N=18 (T-47D), N=15 (ZR-75-1), N=11 (Bre80), N=31 (BT-20), N=25 (MDA-MB-231) and N=29 (GM06990)). Data from all six cell lines are combined; two outliers (1,744 at 8q21.11 (rs2943559) in ZR-75-1 and 1,007 at 8q24.21 (rs13281615) in T-47D) are apparent.

**Supplementary Figure 3: Long-range (>2 Mb) interaction peaks at 3p26.1, 4q24, 8q24.21 and 11q13.1 in Bre80 (Br), MDA-MB-231 (M), ZR-75-1 (Z) and GM06990 (G) cell lines aligned with topologically associated domains (TADs) in human mammary epithelial cells (HMEC).**

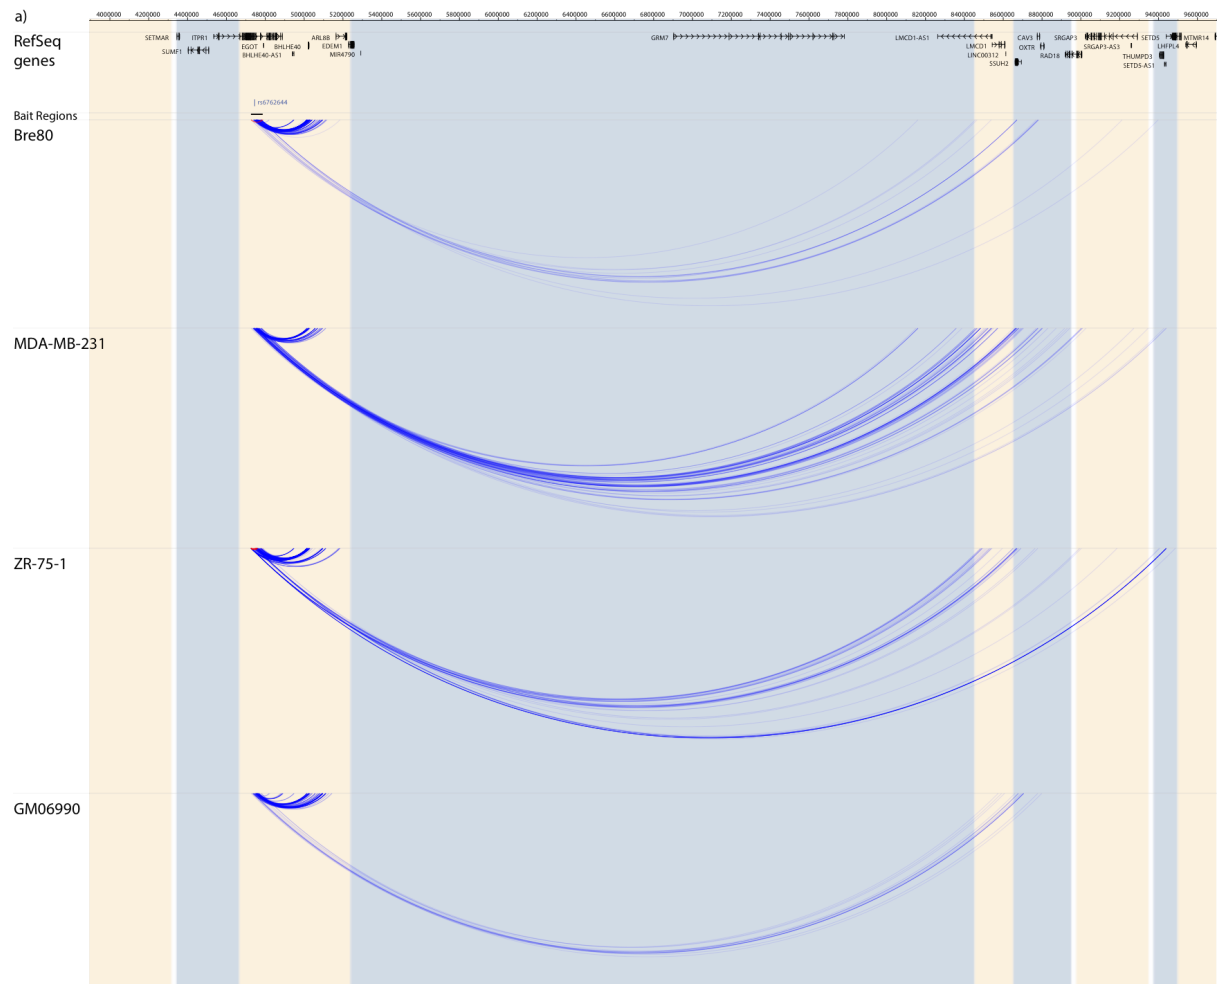

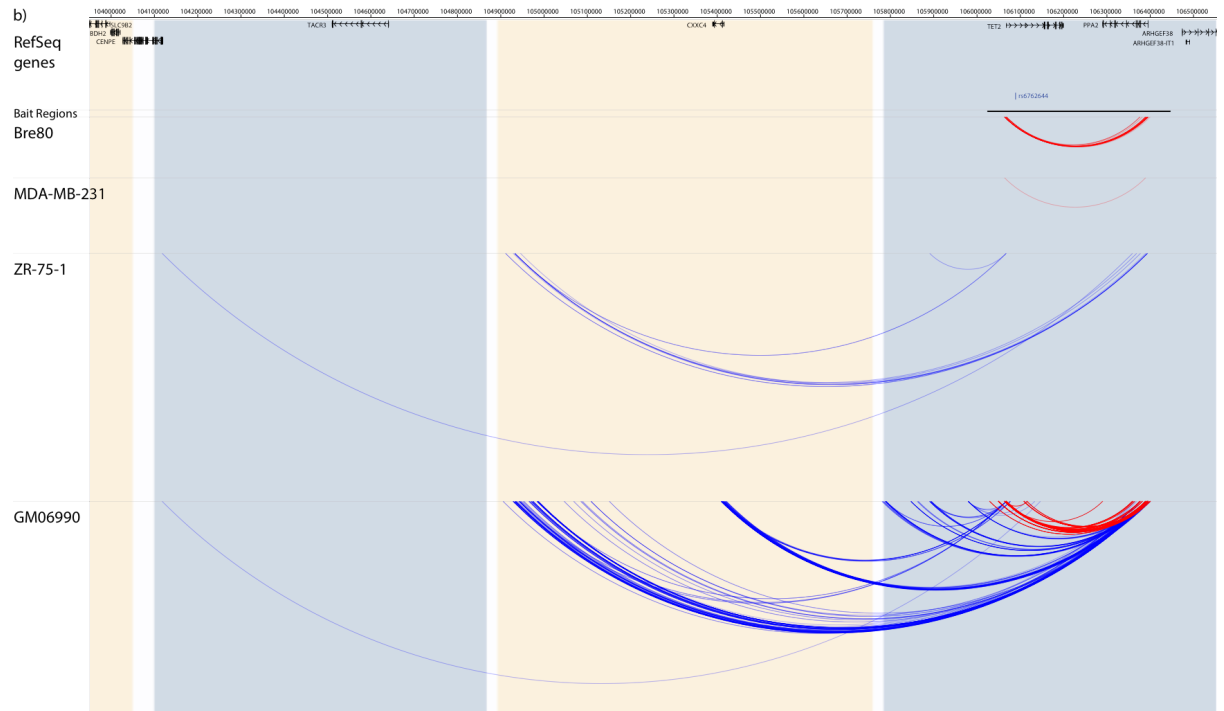

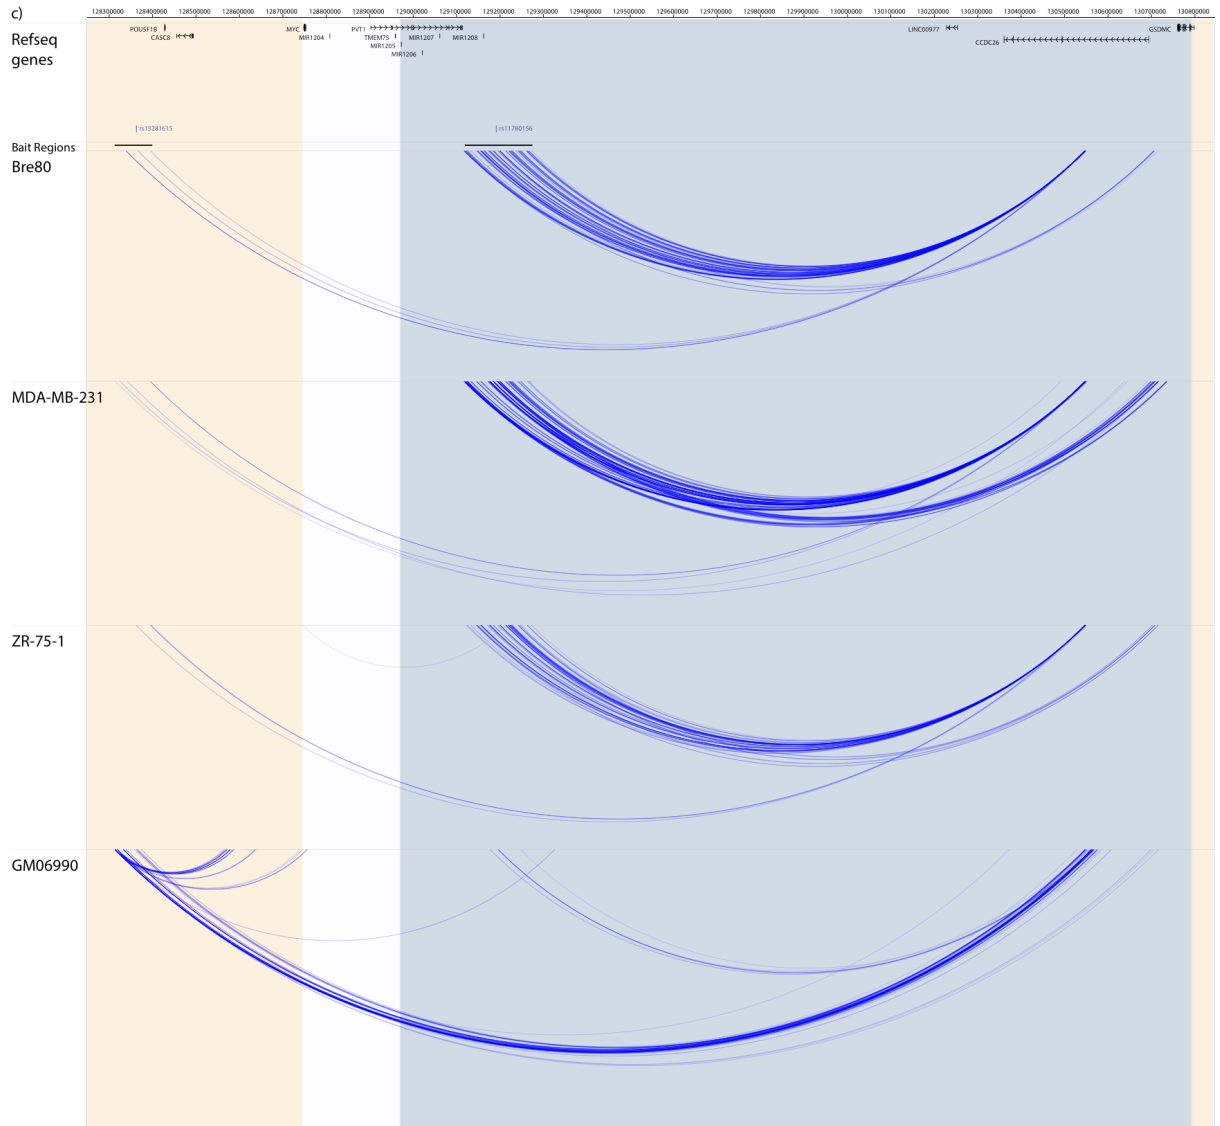

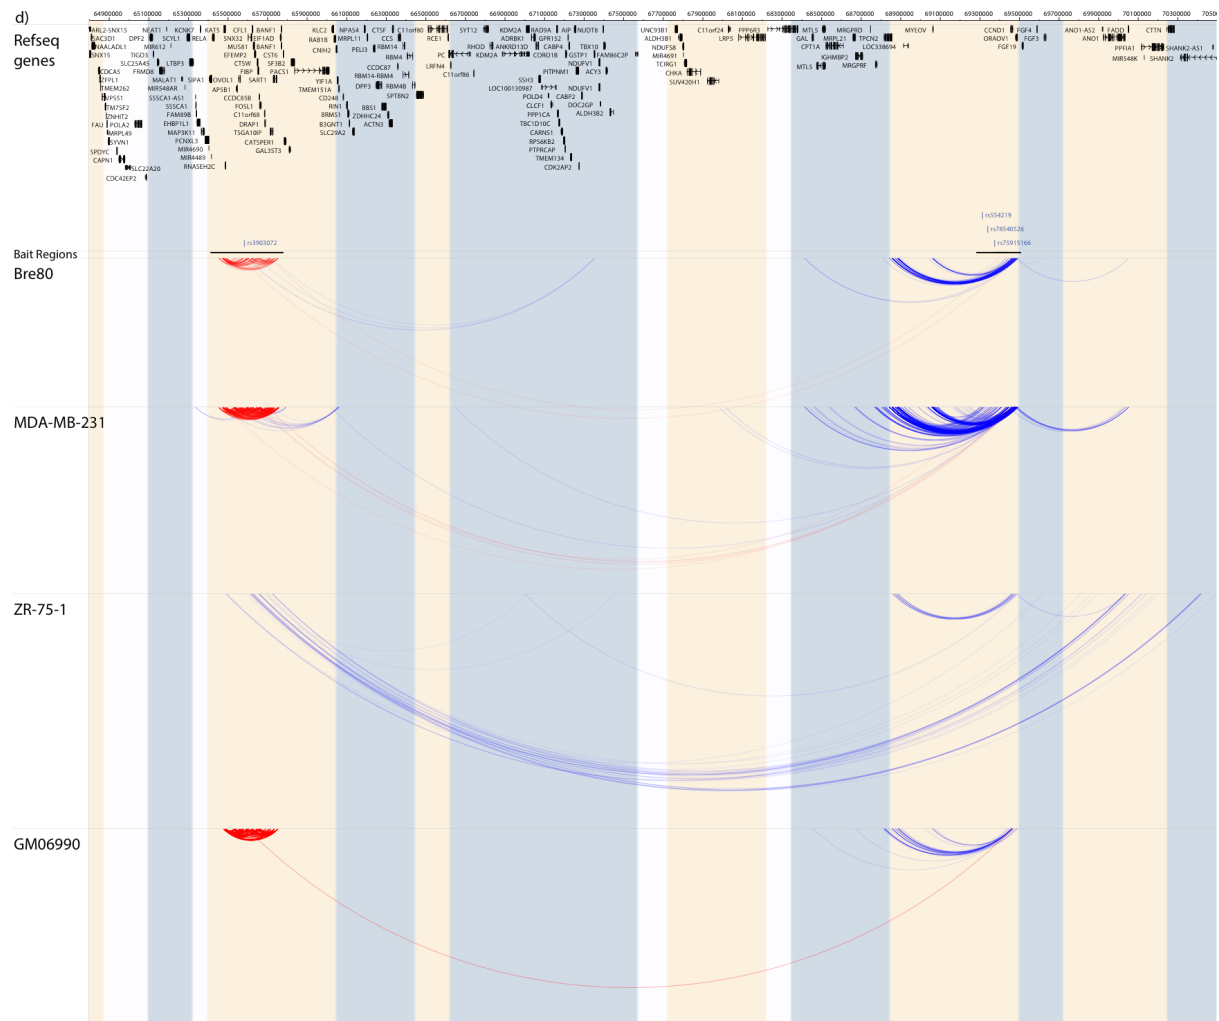

Legend: Interaction peaks (shown in a looping format) are aligned with TADs (shown as alternating blue and beige blocks). TAD boundaries were assigned using data generated in HMECs<sup>22</sup>. Interaction peaks between two captured fragments are red, interaction peaks between one captured fragment and one non-captured fragment are blue. Intensity of individual interactions are proportional to  $-\log_2(P_{FDR})$ . Capture regions are shown as black bars; data are aligned with genomic coordinates (hg19) and RefSeq genes. The subset of cell lines in which interaction peaks with specific target genes are observed are listed after the gene based on the subset of cell lines shown (full details are in Supplementary Table 5) (a) 3p26.1-rs6762644 targets *CAV3* (all), *LMCD1* (Z, M), *c3orf32* (Z, M, G), *RAD18* (M) and *SETD5* (Z, M). All five genes map to two distal adjacent TADs and are separated from rs6762644 by > 4 Mb. (b) 4q24-rs9790517 targets *CENPE* (Z, G) which maps to the boundary of a distal TAD and is separated from rs9790517 by ~ 2 Mb (c) 8q24.21-rs13281615 and rs11780156 target *CCDC26* (G, M). *CCDC26* maps close to the boundary of the TAD that lies adjacent to the capture region at ~ 1 Mb from rs11780156 and ~ 2Mb from rs13281615. (d) 11q13.1-rs3903072 and 11q13.3-rs554219, rs78540526 and rs75915166 target *CCND1* (all) and *FADD* (Br, M, Z). *CCND1* maps to a TAD that is distal to the 11q13.3 capture region, within the same TAD as the 11q13.1 capture region and *FADD* maps to a TAD that is distal to both capture regions. *CCND1* maps ~ 4Mb from rs3903072 and ~100 kb from the 11q13.3 SNPs; *FADD* maps ~ 4.5 Mb from rs3903072 and ~ 700 kb from the 11q13.3 SNPs.

Supplementary Figure 4: Box plots of *CCND1* expression according to rs3903072 genotype.

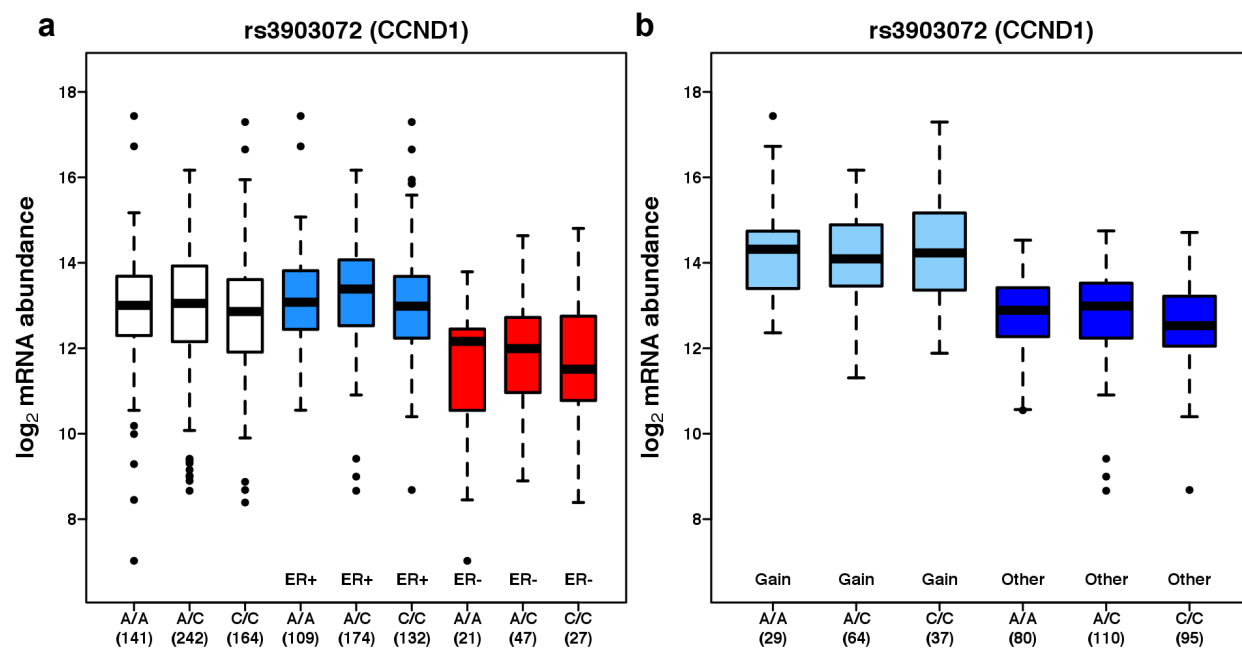

Legend: (a) Levels of expression of *CCND1* are associated with 11q13.1-rs3903072 genotype in all cancers ( $P = 0.03$ ) and ER+ cancers ( $P = 0.04$ ); (b) excluding samples with copy-number gains from the analysis of ER+ cancers did not alter the eQTL association ( $P = 0.05$ ).



Supplementary Figure 5: Kaplan Meier plots of disease-specific survival according to levels of expression for *CENPE* (4q24), *TPCN2* (11q13.3), *ORAOV1* (11q13.3), *PDS5B* (13q13.1) and *SLC4A7* (3p24.1).

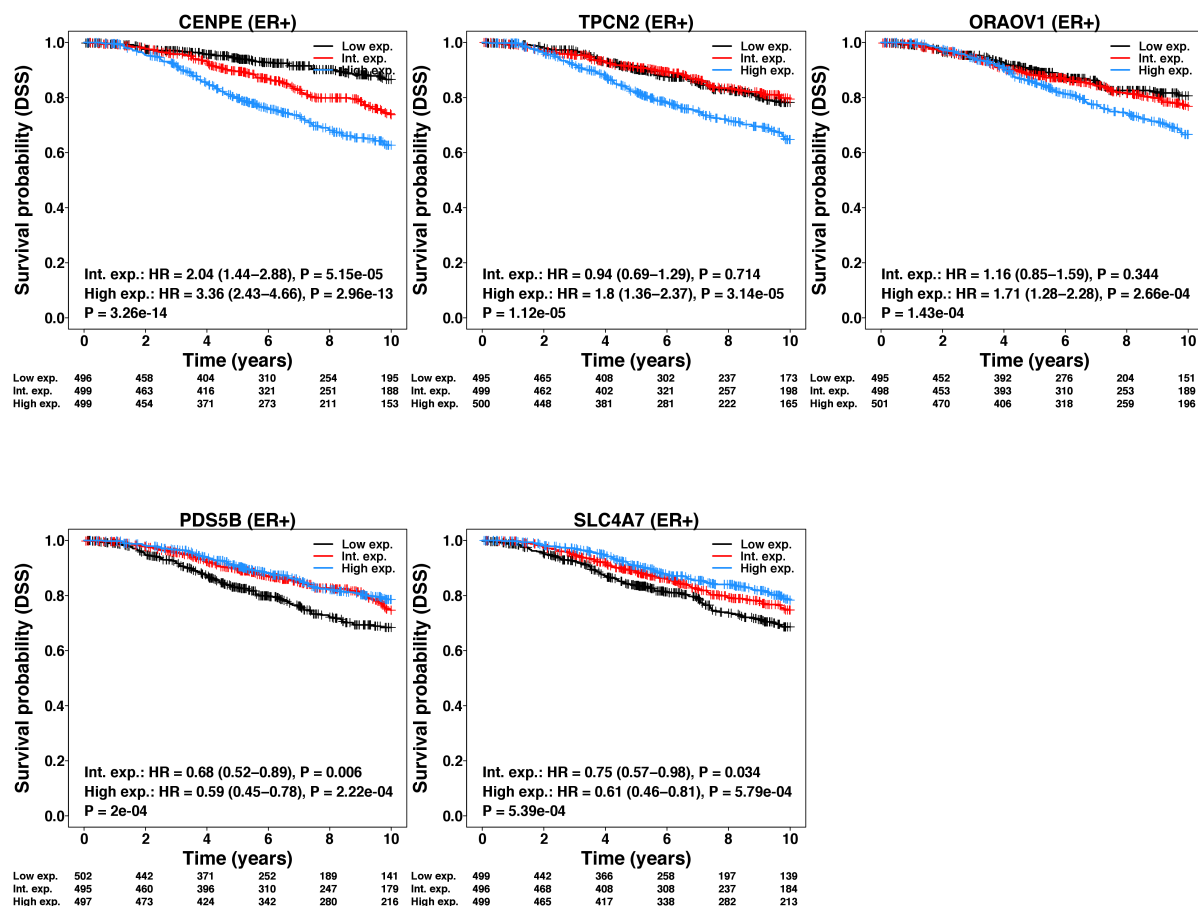

Legend: Levels of expression of *CENPE*, *TPCN2*, *ORAOV1*, *PDS5B*, and *SLC4A7* were all associated with disease-specific survival in ER+ cancers in the Metabric cohort (all FDR adjusted P < 0.005).

## Supplementary Figure 6: Scatterplots showing the correlation between biological duplicates: both fragments captured.

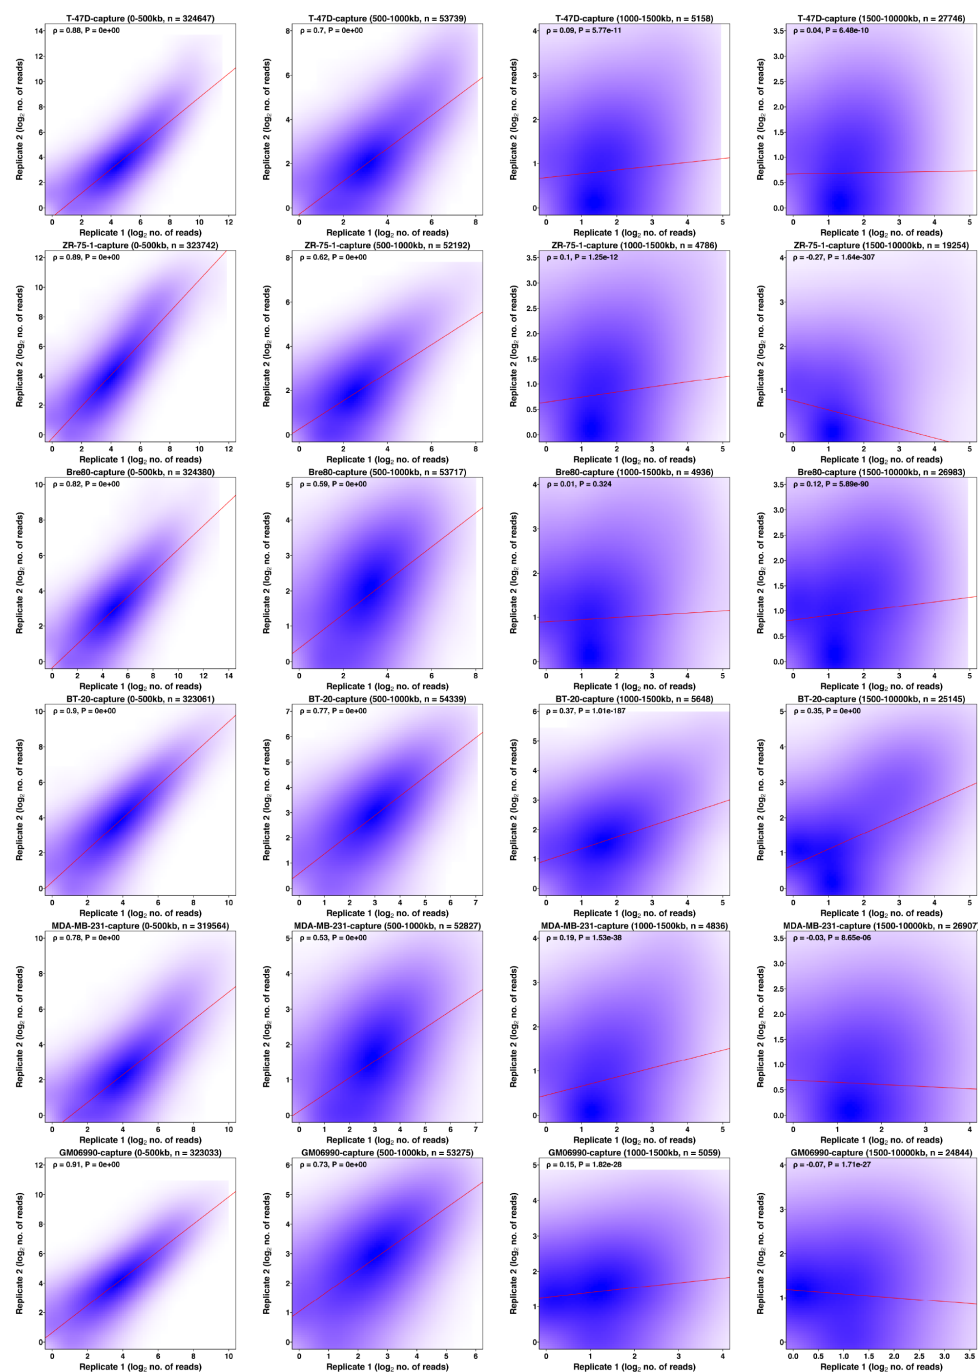

Legend: Scatterplot showing the association (quantified as Spearman's  $\rho$ ) between duplicate libraries based on the number of raw di-tags mapping to each combination of captured HindIII fragments at each locus. The analysis was stratified by cell line and distance between interacting fragments. The intensity of blue colour indicates density of data points. The red line shows the linear regression fit.

## Supplementary Figure 7: Scatterplots showing the correlation between biological duplicates: one fragment captured.

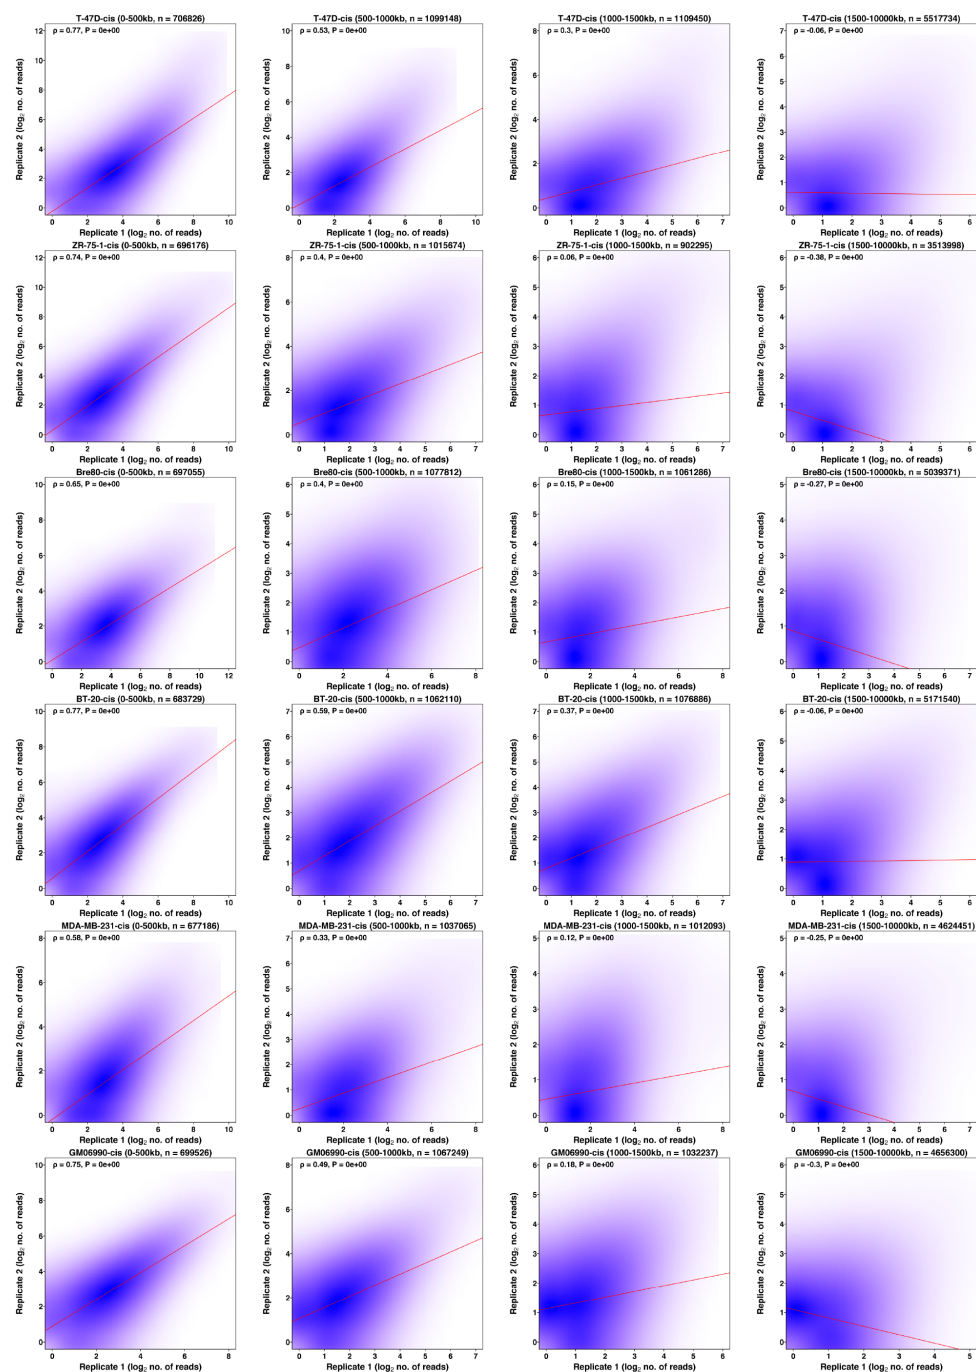

Legend: Scatterplot showing the association (quantified as Spearman's  $\rho$ ) between duplicate libraries based on the number of raw di-tags mapping to each combination of captured HindIII and non-captured (cis) fragments at each locus. The analysis was stratified by cell line and distance between interacting fragments. The intensity of blue colour indicates density of data points. The red line shows the linear regression fit.

**Supplementary Figure 8: Interaction peaks at 10q26.13 in T-47D and MDA-MB-231 cell lines, aligned with raw data.**

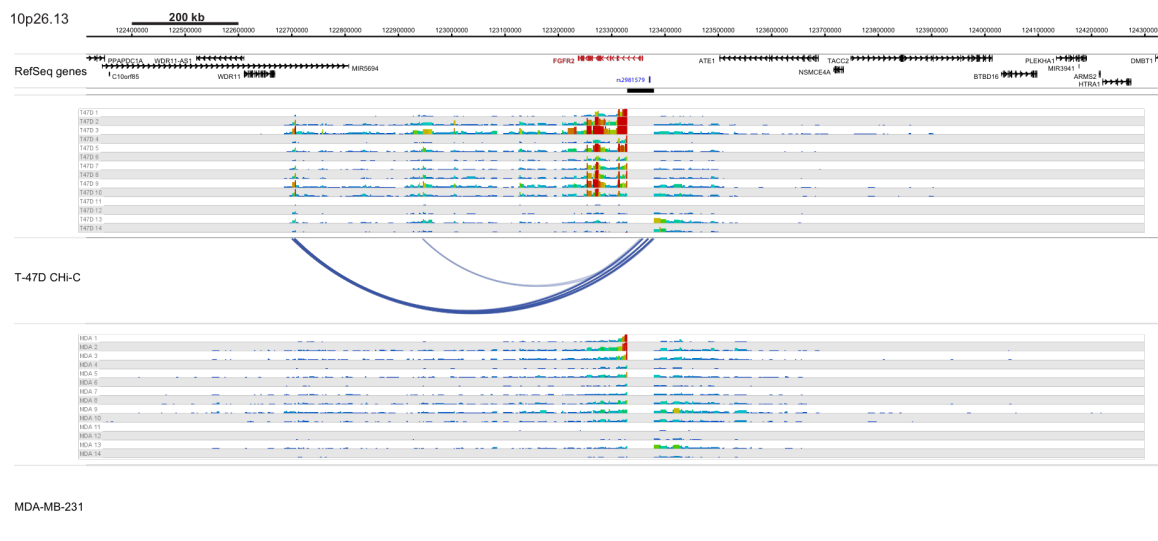

Legend: Interaction peaks, shown in a looping format, are aligned with raw data. Raw data is shown as one virtual 4C library per row (numbered T47D 1 -14 and MDA 1 – 14) such that each row shows the density of reads at each (non-captured) cis fragment forming di-tags with the single captured fragment. Interaction peaks between two captured fragments are red, interaction peaks between one captured fragment and one non-captured fragment are blue. Intensity of individual interactions are proportional to  $-\log_2(P_{FDR})$ . Capture regions are shown as black bars; data are aligned with genomic coordinates (hg19) and RefSeq genes. Target genes (ie the subset at which an interaction peak co-localises with the TSS) are shown in red. At this locus the majority of interaction peaks target consecutive HindIII fragments mapping to 122,701,138-122,708,722 bps (shown in detail in Fig 3b); interaction peaks are called for captured fragments T-47D 8-10 and 12 -14 (represented by this subset of rows). There are no statistically significant interaction peaks at this locus in MDA-MB-231.

**Supplementary Figure 9: Interaction peaks at 11p15.5 in T-47D and MDA-MB-231 cell lines, aligned with raw data.**

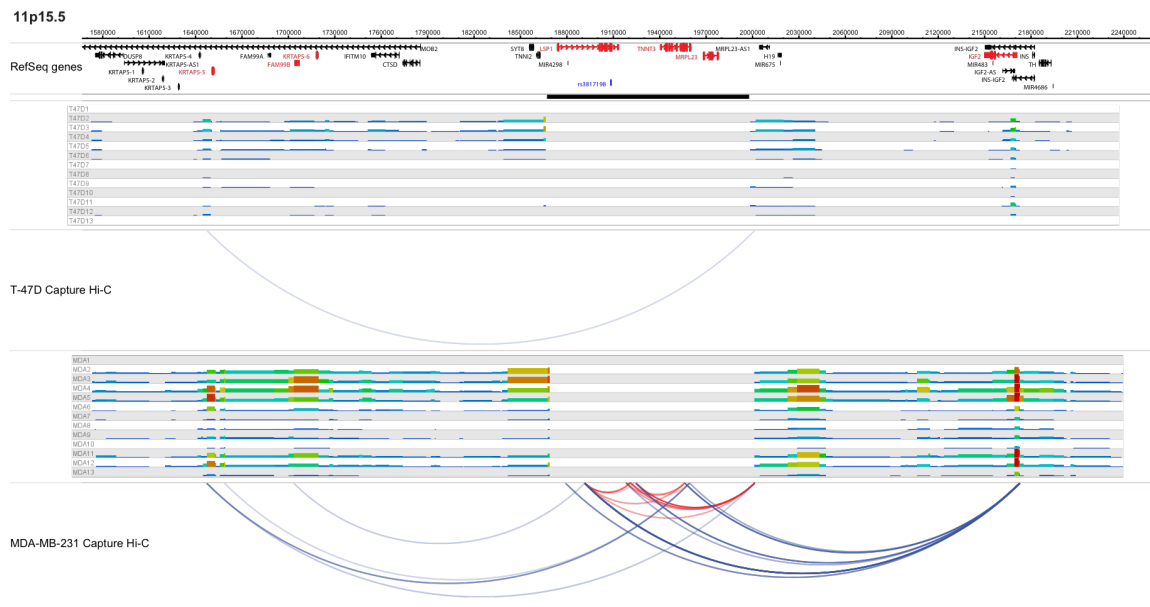

Legend: Interaction peaks and genomic features are as described in Supplementary Figure 8. At this locus, the predominant interaction peaks target uncaptured HindIII fragments mapping to 2169843 - 2173106 bps (colocalising with the *IGF2* TSS) and 1647384 – 1659371 bps (colocalising with the *KRTAP5-5* TSS) in MDA-MB-231. The peaks are specifically called for captured fragments MDA 2 – 5 and 11 – 13 (*IGF2*) and MDA 12 – 13 (*KRTAP5-5*) represented by this subset of rows). There are no significant interaction peaks targeting *IGF2* and just a single interaction peak targeting *KRTAP5-5* in T-47D.

## Supplementary Tables

**Supplementary Table 1: Numbers of interaction peaks according to the number of cell lines in which they were called (FDR corrected P < 0.01)**

| All loci                    |                       | All loci excluding 8q21.11-rs2943559 and 8q24.21-rs13281615 |                       |
|-----------------------------|-----------------------|-------------------------------------------------------------|-----------------------|
| Number of Interaction peaks | Number of occurrences | Number of Interaction peaks                                 | Number of occurrences |
| 7,681 (60.3 %)              | 1                     | 4,924 (50.6 %)                                              | 1                     |
| 2,330 (18.3 %)              | 2                     | 2,102 (21.6 %)                                              | 2                     |
| 1,326 (10.4 %)              | 3                     | 1,308 (13.4 %)                                              | 3                     |
| 648 (5.1 %)                 | 4                     | 644 (6.6 %)                                                 | 4                     |
| 505 (4.0 %)                 | 5                     | 505 (5.2 %)                                                 | 5                     |
| 246 (1.9 %)                 | 6                     | 246 (2.5 %)                                                 | 6                     |

**Supplementary Table 2: QC statistics for 12 Chi-C libraries**

| Library         | Mapped di-tags | Valid di-tags | Valid (%) | Deduplicated di-tags | Deduplicated (%) | On target di-tags | On target (%) | Cis        | Cis (%) | Trans      | Trans (%) |
|-----------------|----------------|---------------|-----------|----------------------|------------------|-------------------|---------------|------------|---------|------------|-----------|
| T-47D (i)       | 153,068,398    | 118,827,997   | 77.6      | 98,388,392           | 82.8             | 71,192,391        | 72.4          | 39,259,451 | 55.1    | 31,932,940 | 44.9      |
| T-47D (ii)      | 85,744,561     | 59,590,376    | 69.5      | 33,552,431           | 56.3             | 27,184,409        | 81.0          | 20,058,702 | 73.8    | 7,125,707  | 26.2      |
| ZR-75-1 (i)     | 141,553,320    | 99,314,565    | 70.2      | 93,293,202           | 93.9             | 35,777,029        | 38.4          | 21,213,875 | 59.3    | 14,563,154 | 40.7      |
| ZR-75-1 (ii)    | 97,359,853     | 47,839,452    | 49.1      | 37,163,213           | 77.7             | 23,770,004        | 64.0          | 19,177,229 | 80.7    | 4,592,775  | 19.3      |
| BT-20 (i)       | 90,513,000     | 70,587,641    | 78.0      | 52,421,830           | 74.3             | 43,600,381        | 83.2          | 23,088,496 | 53.0    | 20,511,885 | 47.0      |
| BT-20 (ii)      | 100,992,749    | 82,762,374    | 81.9      | 75,734,050           | 91.5             | 51,828,022        | 68.4          | 22,460,762 | 43.3    | 29,367,260 | 56.7      |
| MDA-MB-231 (i)  | 98,958,940     | 75,682,339    | 76.5      | 57,566,138           | 76.1             | 47,914,248        | 83.2          | 23,520,035 | 49.1    | 24,394,213 | 50.9      |
| MDA-MB-231 (ii) | 97,867,931     | 48,810,657    | 49.9      | 42,194,379           | 86.4             | 32,906,011        | 78.0          | 9,670,919  | 29.4    | 23,235,092 | 70.6      |
| Bre80 (i)       | 138,773,826    | 106,633,135   | 76.8      | 69,093,301           | 64.8             | 45,665,199        | 66.1          | 38,700,750 | 84.8    | 6,964,449  | 15.2      |
| Bre80 (ii)      | 97,889,433     | 79,683,520    | 81.4      | 72,995,046           | 91.6             | 52,765,189        | 72.3          | 16,464,007 | 31.2    | 36,301,182 | 68.8      |
| GM06990 (i)     | 119,162,182    | 76,656,519    | 64.3      | 74,218,586           | 96.8             | 29,601,946        | 39.9          | 17,915,075 | 60.5    | 11,686,871 | 39.5      |
| GM06990 (ii)    | 102,319,005    | 78,596,635    | 76.8      | 58,687,568           | 74.7             | 48,340,624        | 82.4          | 24,788,802 | 51.3    | 23,551,822 | 48.7      |

These figures include di-tags mapping to 1,254 captured HindIII fragments that did not map to known breast cancer risk loci and were not considered further in this study.

**Supplementary Table 3: ENCODE DNase I and CHIP-Seq data generated in T-47D cells (shown in Figure 2).**

| Marker/cell                   | Data type | Source           | Laboratory         | GEO accession |
|-------------------------------|-----------|------------------|--------------------|---------------|
| T-47D                         |           |                  |                    |               |
| DNase (DMSO)                  | peaks     | ENCODE/OpenChrom | Duke               | GSM816673     |
| DNase (E <sub>2</sub> )       | peaks     | ENCODE/OpenChrom | Duke               | GSM1008576    |
| CTCF (DMSO)                   | peaks     | ENCODE           | Myers/Hudson-Alpha | GSM803348     |
| FOXA1 (DMSO)                  | peaks     | ENCODE           | Myers/Hudson-Alpha | GSM803409     |
| GATA3 (DMSO)                  | peaks     | ENCODE           | Myers/Hudson-Alpha | GSM803514     |
| p300 (DMSO)                   | peaks     | ENCODE           | Myers/Hudson-Alpha | GSM803522     |
| ER $\alpha$ (E <sub>2</sub> ) | peaks     | ENCODE           | Myers/Hudson-Alpha | GSM803539     |
| ER $\alpha$ (Genistein)       | peaks     | ENCODE           | Myers/Hudson-Alpha | GSM803374     |
